# Supplementary material for: One-pot synthesis of cup-like ZSM-5 zeolite and its excellent oxidative desulfurization performance
Source: Royal Society of Chemistry journal article supplement (doi:10.1039/c8ra06984k), 2018-01-01
Supplement: c8ra06984k1.pdf [file c8ra06984k1.pdf]

# Supporting information

## One-pot Synthesis of Cup-like ZSM-5 Zeolite and Its Excellent Oxidative Desulfurization Performance

Yuan Zhang<sup>a</sup>, Wei Zhang<sup>\*a</sup>, Ju Zhang <sup>a</sup>, Zhao Dong <sup>a</sup>, Xiongfeng Zhang<sup>b</sup>, Shujiang Ding<sup>\*c</sup>

<sup>a</sup> Research Institute of Yanchang Petroleum (Group) Co., LTD., Xi'an 710075, China

<sup>b</sup> National Key Laboratory of Fine Chemicals, School of Chemical Engineering, Dalian University of Technology, Dalian, 116024, China

<sup>c</sup> Department of Applied Chemistry, School of Science, Xi'an Jiaotong University, Xi'an, 710049, China

\*To whom correspondence should be addressed. Email: ycsy\_zw@163.com, dingsj@xjtu.edu.cn

### 1 Chemicals

Sodium metaaluminate ( $\text{NaAlO}_2$ ): chemically pure. Purity (Measured by  $\text{Al}_2\text{O}_3$ )  $\geq 41\%$ . Tetraethoxysilane (TEOS): analytically pure. Purity  $\geq 98\%$ . Tetrapropylammonium hydroxide (TPAOH): Purity = 25%.

### 2 Synthesis

#### 2.1 The synthesis of solid ZSM-5 zeolite

17.6 mL TPAOH and 30.0 mL water was mixed, and then 0.6 g  $\text{NaAlO}_2$  was added until it was dissolved. Next, 16.0 mL TEOS was added drop wise until the mixture was uniform. The mixture was put in a crystallization reactor and crystallized under  $170^\circ\text{C}$  for 8 hours. Then the products was filtered, washed, and dried to obtain solid ZSM-5 molecular sieves. Finally, the sample was converted into H-ZSM-5 through ion exchanges with  $\text{NH}_4\text{NO}_3$  solution at  $90^\circ\text{C}$  for three times and calcinated at  $550^\circ\text{C}$  for 5h.

#### 2.2 The synthesis of cup-like ZSM-5 zeolite

TPAOH and water was mixed, and then sodium metaaluminate was added until it was dissolved. Next, TEOS was added drop wise until the mixture was uniform.

The mixture was stirred strongly for 2h, put in a crystallization reactor and crystallized under certain temperature for 12 to 48 hours in a specially-made rotation oven. Then the products was filtered, washed, and dried to obtain small-sized hollow ZSM-5 molecular sieves. Finally, the sample was converted into H-ZSM-5 through ion exchanges with  $\text{NH}_4\text{NO}_3$  solution at  $90^\circ\text{C}$  for three times and calcinated at  $550^\circ\text{C}$  for 5h.

### 3 Characterization

3.1 Powder XRD patterns: automated X-ray diffractometer (Rigaku Corporation of Japan, D/max-2400). Cu target  $\text{K}\alpha$  radiation. Tube power 12kW. Voltage 40kV. Current 100mA. Scanning rate  $8^\circ$  per min. Oscillation range  $0.02^\circ$ . Scanning range  $5\sim 50^\circ$ .

3.2 IR : Bruker EQUINOX55 Fourier transform infrared spectroscopy.

3.3 SEM : scanning electron microscope (FEI, NOVA SEM 450)

3.4 TEM : transmission electron microscopy (Tecnai F30 and JEM-2100).

3.5.  $\text{NH}_3$ -TPD AutoChem II 2920

The samples were ion exchanged three times with 1M  $\text{NH}_4\text{NO}_3$  at  $90^\circ\text{C}$  for 2h, dried at  $110^\circ\text{C}$  and calcined in air at  $550^\circ\text{C}$  for 5h.  $\text{NH}_3$ -TPD was carried out with a Thermo TPDRO instrument equipped with a TCD detector. The sample was heated to  $900^\circ\text{C}$  with  $10^\circ\text{C}/\text{min}$ .

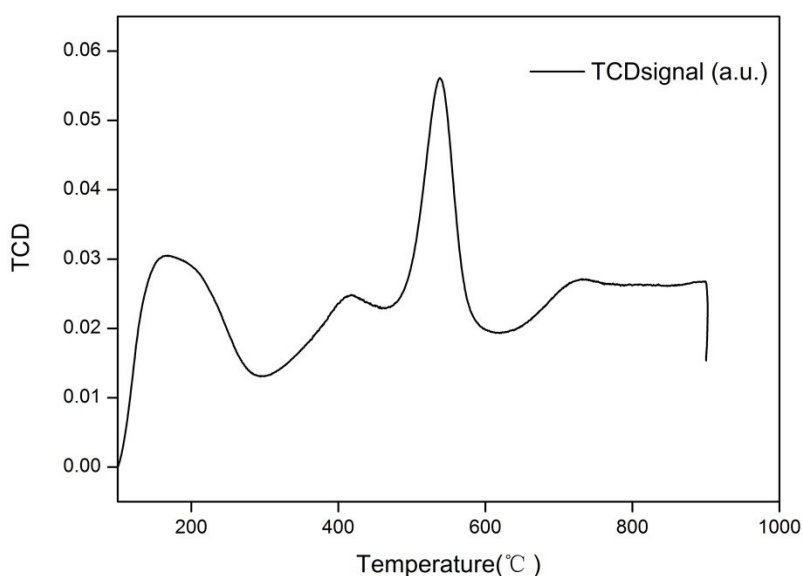

**Fig. S1**  $\text{NH}_3$ -TPD of the synthesized hollow molecular sieves (crystallization temperature 130 °C, crystallization time 48h,  $\text{OH}^-/\text{SiO}_2=0.3$ )

### 3.6.XPS

Elemental analysis was characterized by X-ray Photoelectron Spectroscopy (XPS; Kratos, AXIS ULtrabl).

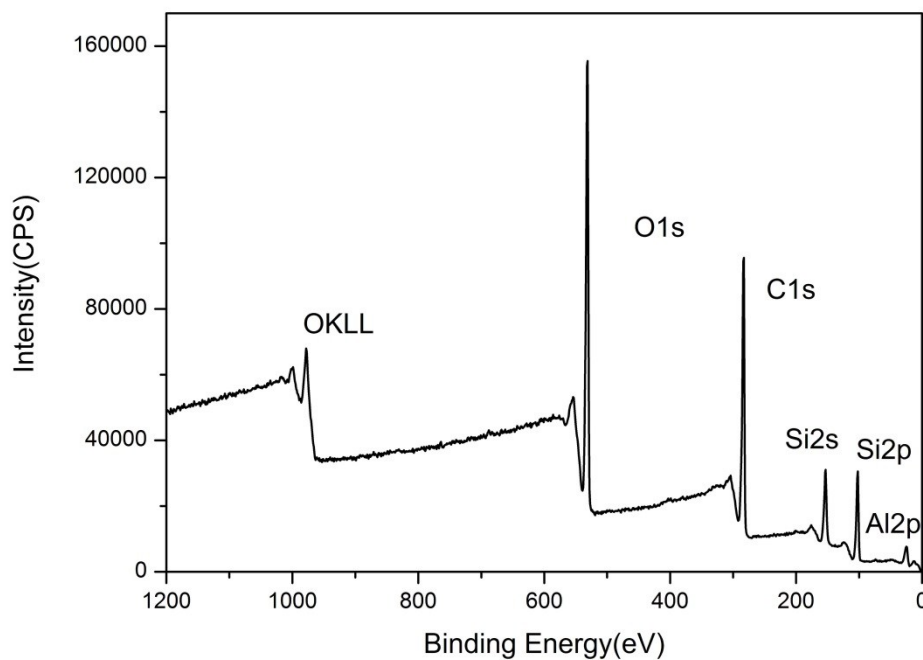

**Fig. S2** Elemental analysis of synthesized hollow molecular sieves (crystallization temperature 130 °C, crystallization time 48h,  $\text{OH}^-/\text{SiO}_2=0.3$ )

### 3.7. $\text{N}_2$ adsorption and desorption

$\text{N}_2$  adsorptions at 77K for the samples were performed on an apparatus of Micromeritics ASAP 2460. Before the adsorption, the samples were pretreated in vacuum at 300°C for 6 h to remove the physical adsorption of water in the holes.

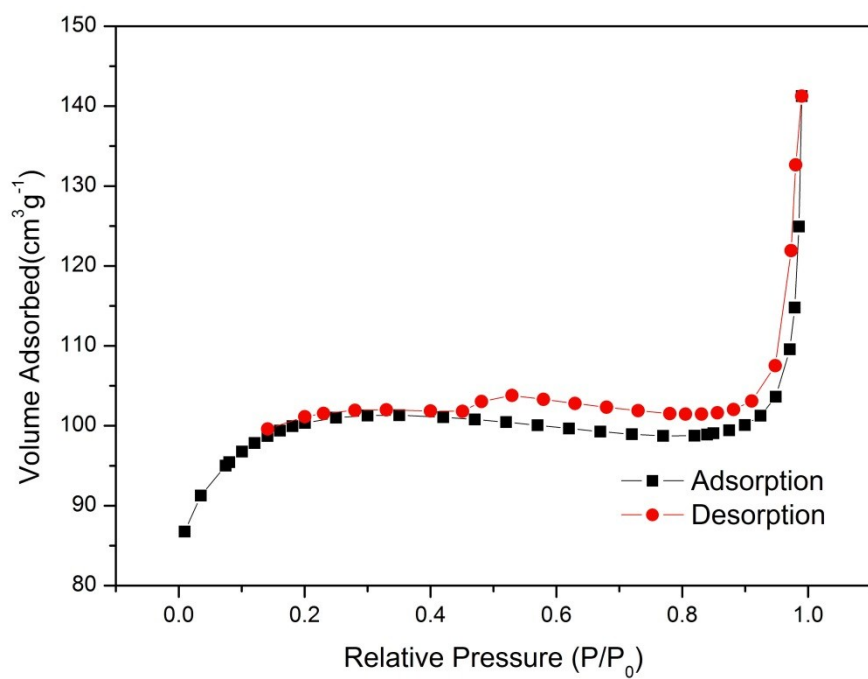

**Fig. S3** N<sub>2</sub> desorption and adsorption of the synthesized hollow molecular sieves (crystallization temperature 130 °C, crystallization time 48h, OH<sup>-</sup>/SiO<sub>2</sub>=0.3)
